# Supplementary material
Source: HighWire-hosted journal article supplement (https://bmjopenquality.bmj.com/highwire/filestream/143164/field_highwire_adjunct_files/0/bmjoq-2021-001433supp001_data_supplement.pdf)
Supplement: bmjoq-2021-001433supp001_data_supplement.pdf [file bmjoq-2021-001433supp001_data_supplement.pdf]

**Supplemental Table 1. Rate of recurrent TIA/Stroke at 6 months after the index event.**

|                      | <b>Phase 1<br/>(n = 136)</b> | <b>Phase 2<br/>(n = 105)</b> | <b><i>p</i></b> |
|----------------------|------------------------------|------------------------------|-----------------|
| Recurrent TIA/Stroke | 10 (7.4 %)                   | 1 (1%)                       | 0.018           |

TIA, Transient Ischemic Attack.
